# Supplementary material for: Multiplex detection of bacterial pathogens by PCR/SERS assay
Source: Royal Society of Chemistry journal article supplement (doi:10.1039/d4an00037d), 2024-01-01
Supplement: d4an00037d1.pdf [file d4an00037d1.pdf]

## Electronic Supplementary Information (ESI)

### Multiplex detection of bacterial pathogens by PCR/SERS assay

Nana Lyu<sup>a</sup>, Phani Rekha Potluri<sup>a</sup>, Vinoth Kumar Rajendran<sup>a</sup>,  
Yuling Wang<sup>\*a,b</sup> and Anwar Sunna<sup>\*a,b</sup>

<sup>a</sup> School of Natural Sciences, Macquarie University, Sydney, NSW 2109, Australia

<sup>b</sup> Biomolecular Discovery Research Centre, Macquarie University, NSW 2109, Australia

\* Corresponding authors: [yuling.wang@mq.edu.au](mailto:yuling.wang@mq.edu.au); [anwar.sunna@mq.edu.au](mailto:anwar.sunna@mq.edu.au);

**Table S1.** Sequences of oligonucleotides and the PCR amplicons used in this study.

| Target                | Description                                   | 5'-Sequence-3'                                                                                                                                                                                                                                                                                         |
|-----------------------|-----------------------------------------------|--------------------------------------------------------------------------------------------------------------------------------------------------------------------------------------------------------------------------------------------------------------------------------------------------------|
| <i>P. aeruginosa</i>  | Amplicon<br>(size: 135 bp)                    | TCCATAAAAGCCCTCTTCCGCTCCCCGCCAGCCTCCCCGCATCCC<br>GCACCCTAGACGCCCCGCCGCTCTCCGCCGGCTCGCCCGACAAGA<br>AAAACCAACCGCTCGATCAGCCTCATCCTTCACCCATCACAGGA                                                                                                                                                         |
|                       | Forward primer                                | CAGATCGTCATGTTTC/iSpC3/TCCATAAAAGCCCTCTTCC                                                                                                                                                                                                                                                             |
|                       | Reverse primer                                | /5Biosg/TCCTGTGATGGGTGAAGGAT                                                                                                                                                                                                                                                                           |
|                       | DNA probe                                     | GAACATGACGATCTGTTTTT/3ThioMC6-D                                                                                                                                                                                                                                                                        |
|                       | Amplicon<br>(size: 219 bp)                    | GGAGAAACTGGCAGACAAATTGGGTGGTTTATATCATATGATAAAG<br>ATAATCCAAACATGATGATGGCTATTAATGTTAAAGATGTACAAGAT<br>AAAGGAATGGCTAGCTACAATGCCAAAATCTCAGGTAAAGTGTAT<br>GATGAGCTATATGAGAACGGTAATAAAAAATACGATATAGATGAAT<br>AACAAAAGCAGTGAAGCATCCGTAACGATGGTTGC                                                            |
| Forward primer        | TACACAGCAC/iSpC3/GGAGAAACTGGCAGACAAATTGGGTGGT |                                                                                                                                                                                                                                                                                                        |
| Reverse primer        | /5Biosg/GCAACCATCGTTACGGATTGCTTCACTG          |                                                                                                                                                                                                                                                                                                        |
| DNA probe             | GTGCTGTGTATTTTTT/3ThioMC6-D                   |                                                                                                                                                                                                                                                                                                        |
| <i>S. epidermidis</i> | Amplicon<br>(size: 275 bp)                    | TTGTGGGTCAAGAAATCATAACCGTATCCTGGTAATAGTGATTTAGC<br>AATCTTAAGAGTGTACCAAACGAACATAATCAACATATTGGTCAA<br>GTAGTTAAACCTGCAACTATAAGTAGCAATACAGACACTAGAATTA<br>ATGAAAACATCACTGTTACTGGTTACCTGGTGACAAACCATTAGC<br>CACAATGTGGGAAAGTGTAGGTAAAGTTGTCTATATTGGTGGCGA<br>GGAATTAAGATATGACCTAAGTACTGTAGGTGGAAACTCTGGATCT |
|                       | Forward primer                                | ACGATGCATG/iSpC3/TTGTGGGTCAAGAAATCATAACCGT                                                                                                                                                                                                                                                             |
|                       | Reverse primer                                | /5Biosg/AGATCCAGAGTTTCCACCTACAGT                                                                                                                                                                                                                                                                       |
|                       | DNA probe                                     | CATGCATCGTTTTTT/3ThioMC6-D                                                                                                                                                                                                                                                                             |

|                     |                            |                                                                                                                                                                                                                                                                                                                                                                                                       |
|---------------------|----------------------------|-------------------------------------------------------------------------------------------------------------------------------------------------------------------------------------------------------------------------------------------------------------------------------------------------------------------------------------------------------------------------------------------------------|
| <i>M. smegmatis</i> | Amplicon<br>(size: 292 bp) | GGCTCGATGTCACTGTCCTTCTCGGATCCGCGCTTCGACGAGGTC<br>AAGGCCTCGGTTCGACGAGTGCAAAGACAAGGACATGACGTACGC<br>GGCCCCGCTGTTTCGTCACGGCTGAGTTCATCAACAACAACACCGG<br>CGAGATCAAGAGCCAGACGGTCTTCATGGGTGACTTCCCAGATGAT<br>GACCGAAAAGGGCACCTTCATCATCAACGGCACCGAGCGCGTCGT<br>GGTGTCGACGCTGGTCCGTTCCGCTGGCGTGTACTTCGACGAGAC<br>CATCGACAAGTCCACCGAGAAGA                                                                       |
|                     | Forward primer             | AGTCTGATGGCAGCA/iSpC3/GGCTCGATGTCACTGTCCTTCTC                                                                                                                                                                                                                                                                                                                                                         |
|                     | Reverse primer             | /5Biosg/TCTTCTCGGTGGACTTGTCGATG                                                                                                                                                                                                                                                                                                                                                                       |
|                     | DNA probe                  | TGCTGCCATCAGACTTTTTT/3ThioMC6-D                                                                                                                                                                                                                                                                                                                                                                       |
| <i>P. mirabilis</i> | Amplicon<br>(size: 362 bp) | CGAGATGATTTTACGCTTTCTCAAGGATATGAAACCCAAATTGGT<br>GCTCACGGTGAAGGATTATCCGGCGGACAAAAACAACGTATTGCA<br>TTAGCCAGAGCATTATATGGCGATCCCACGTTAGTTGTCTTAGATG<br>AGCCAAATTCTAATTTAGATGATTTAGGTATTAGAGCGTTAACACA<br>GGCGATCGAAACATTAAAACAGCATAAAAAAACCGTTATTTTAATT<br>ACCCACCAAAAACAGCTACTTTCTGTCTACTAATAAATTATTAGTGA<br>TATTTGATGGAAACACCAAATTATTCGGTCCAACGGCGTCTGTTAT<br>TGCTGAATTAATAATCCGACTATCACAAAAACGGCAAACA |
|                     | Forward primer             | TCTGCACCAATGTAC/iSpC3/CGAGATGATTTTACGCTTTCCTCA                                                                                                                                                                                                                                                                                                                                                        |
|                     | Reverse primer             | /5Biosg/TGTTTGCCGTTTTTGTGATAGTCG                                                                                                                                                                                                                                                                                                                                                                      |
|                     | DNA probe                  | GTACATTGGTGCAGATTTTT/3ThioMC6-D                                                                                                                                                                                                                                                                                                                                                                       |

Modifications are as indicated. iSpC3: internal modification with C3 spacer, 5Biosg: 5'-biotin modified, ThioMC6-D: 3'-thiol modifier C6 S-S (disulfide). The text in red represents the position of primers, and the text in blue highlights complementary sequence in primers and DNA probe nanotags.

**Table S2.** Reaction mixture for 4-plex PCR

| Reaction mixture                            | Volume ( $\mu\text{L}$ ) |
|---------------------------------------------|--------------------------|
| 5 $\times$ MyTaq Reaction Buffer            | 5                        |
| <i>P. aeruginosa</i> F (10 $\mu\text{M}$ )  | 0.5                      |
| <i>P. aeruginosa</i> R (10 $\mu\text{M}$ )  | 0.5                      |
| <i>S. aureus</i> F (10 $\mu\text{M}$ )      | 0.5                      |
| <i>S. aureus</i> R (10 $\mu\text{M}$ )      | 0.5                      |
| <i>S. epidermidis</i> F (10 $\mu\text{M}$ ) | 0.5                      |
| <i>S. epidermidis</i> R (10 $\mu\text{M}$ ) | 0.5                      |
| <i>M. smegmatis</i> F (10 $\mu\text{M}$ )   | 0.5                      |
| <i>M. smegmatis</i> R (10 $\mu\text{M}$ )   | 0.5                      |
| DNA Polymerase (5 U/ $\mu\text{L}$ )        | 0.3                      |
| Input targets gDNA (5 ng/ $\mu\text{L}$ )   | 2                        |
| Nuclease-free water                         | 13.7                     |
| <b>Total volume</b>                         | <b>25</b>                |

F: Forward primer, R: Reverse primer

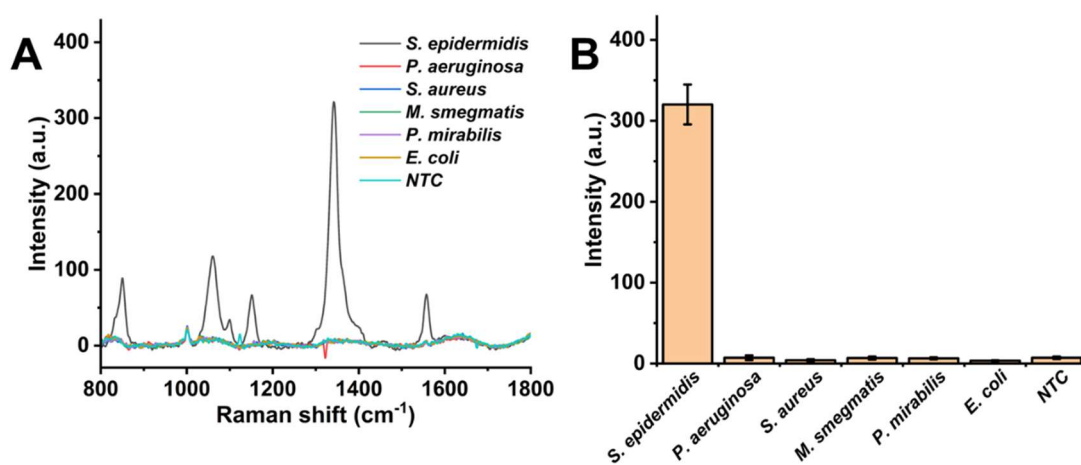

**Fig. S1** Specific identification of *S. epidermidis* gDNA amplicons by SERS nanotags. (A) Typical raw Raman spectra and (B) bar graph of average SERS intensities at 1343 cm<sup>-1</sup>. NTC is the no-template control.

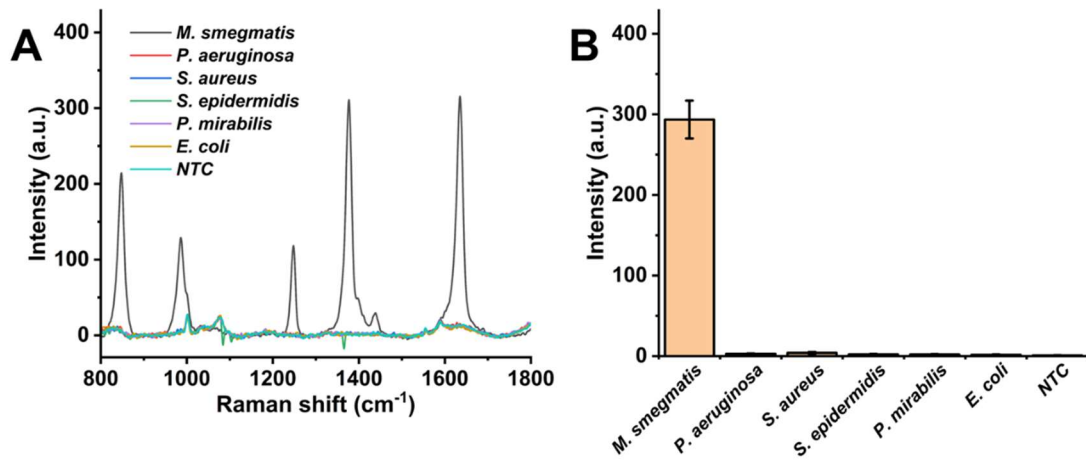

**Fig. S2** Specific identification of *M. smegmatis* gDNA amplicons by SERS nanotags. (A) Typical raw Raman spectra and (B) bar graph of average SERS intensities at 1380 cm<sup>-1</sup>. NTC is the no-template control.
